# Supplementary material
Source: publisher site journal article supplement (https://www.spandidos-publications.com/5804/downloadSupplementary)

Figure S2. Cell viability of iPSCs cultured with gefitinib of serial concentrations. The cells were incubated with WST-8 (Cell counting kit, Dojindo, Kumamoto, Japan) after 2-day incubation with gefitinib of serial concentrations (0, 3, 6, 10  $\mu\text{M}$ ). Dose dependency of gefitinib in the assay was statistically analyzed in each group (n=3). Notice that the cells in T group were more strongly damaged with gefitinib in a dose dependent manner, compared to those in N group. \*P<0.05, Dunnett's test. T, toxicity; N, no toxicity; iPSCs, induced pluripotent stem cells.

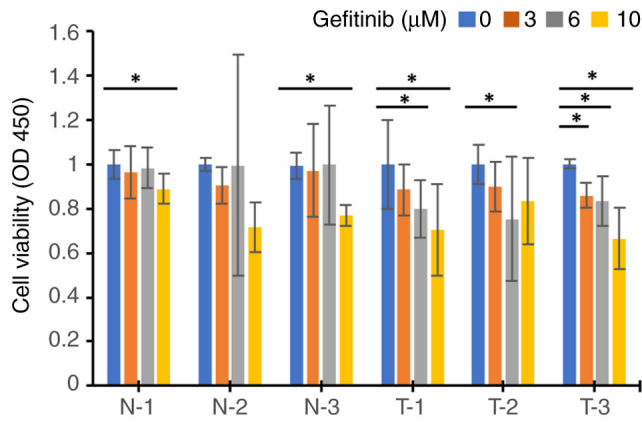

Figure S3. Photographs of iPSCs cultured with gefitinib of serial concentrations. The cells from (A-D) N-1, (E-H) N-2, (I-L) N-3, (M-P) T-1, (Q-T) T-2, and (U-X) T-3 were treated with gefitinib of serial concentrations [0  $\mu$ M (A, E, I, M, Q, U), 3  $\mu$ M (B, F, J, N, R, V), 6  $\mu$ M (C, G, K, O, S, W), 10  $\mu$ M (D, H, L, P, T, X)]. At day 2 after gefitinib treatment, the photographs were taken with EVOS XL Core Imaging System (ThermoFisher, Waltham, MA) at the magnification of 10x. T, toxicity; N, no toxicity; iPSCs, induced pluripotent stem cells.

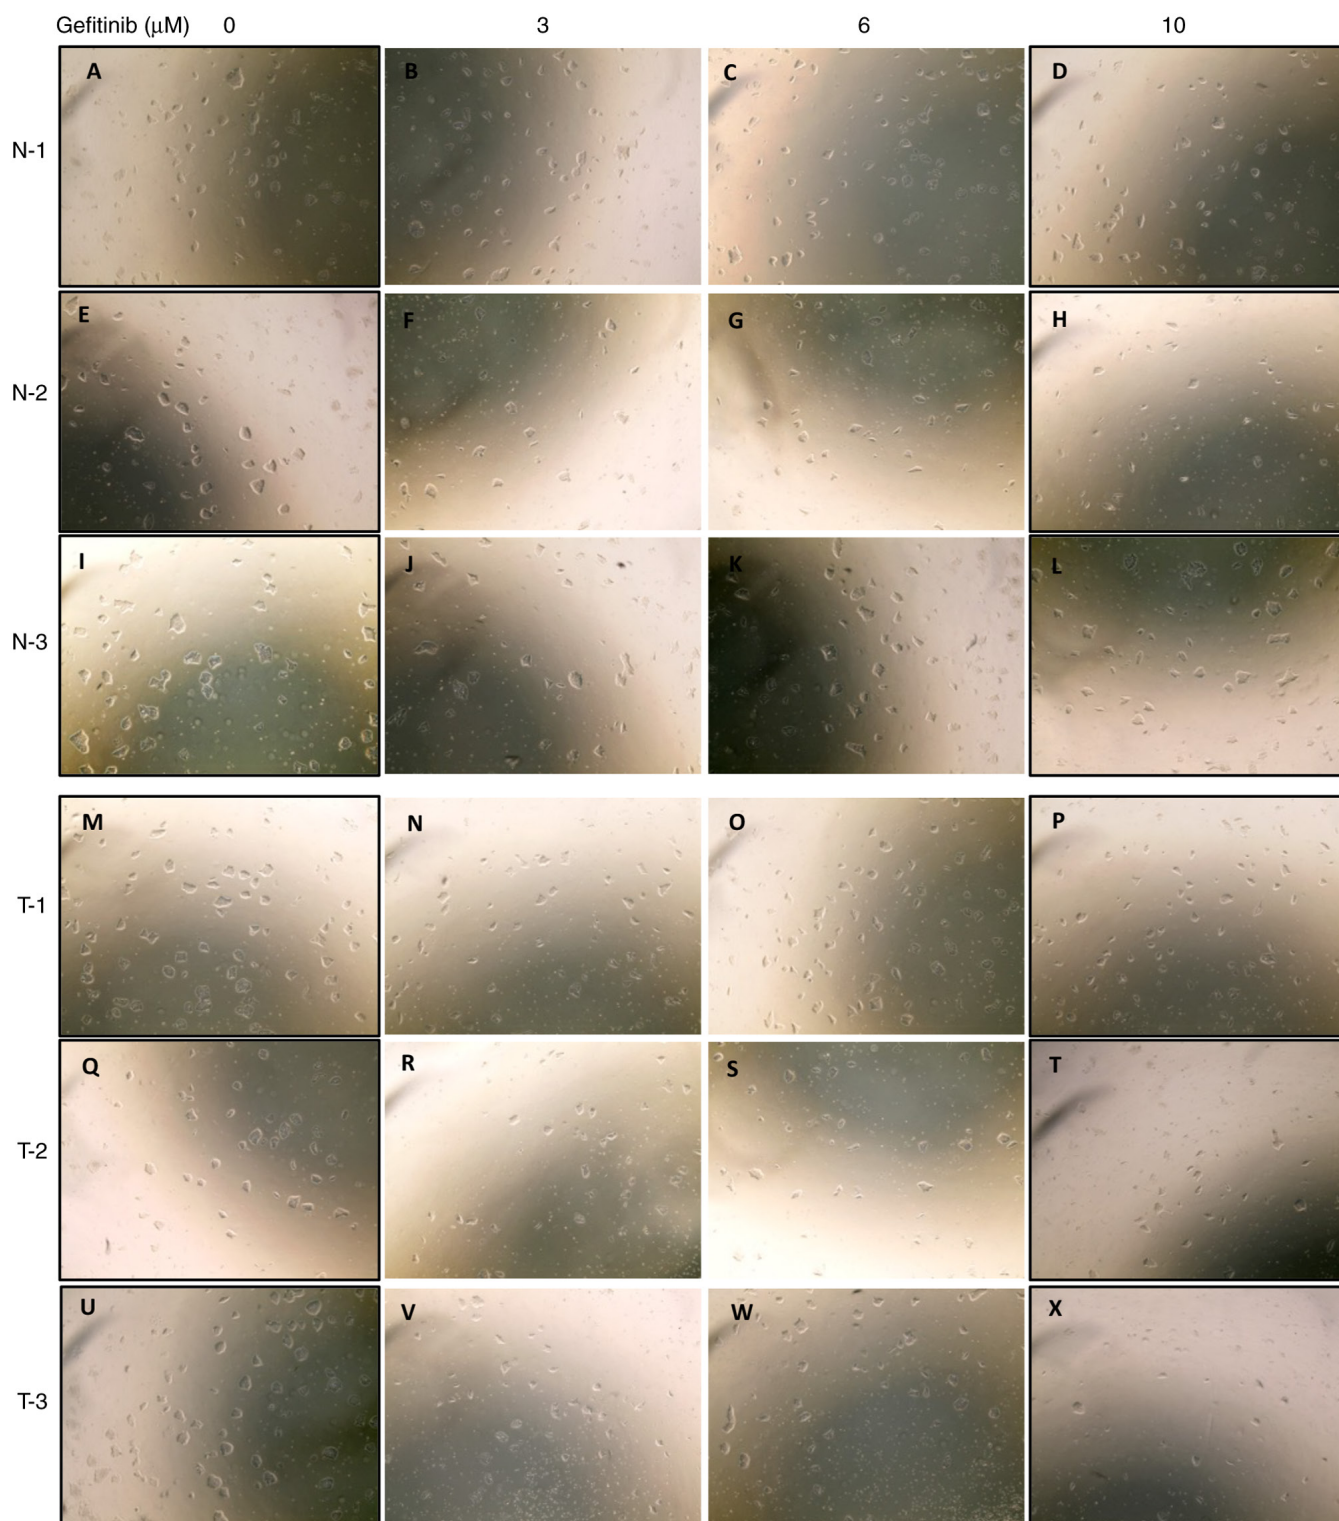

Supplement: Supplementary file 1 [file downloadSupplementary]
